# Supplementary material
Source: publisher figshare collection journal article supplement (https://sage.figshare.com/ndownloader/files/21494841)
Supplement: Supplementary file 1 [file 21494841]

# PREJUDICE REDUCTION THROUGH PARASOCIAL CONTACT

## Online Appendix

Table A1

### *Content Analysis of Experimental Stimulus*

|                              | Michael     |                  | Brian        |                        | Justin       |                        | Emmett      |                  |
|------------------------------|-------------|------------------|--------------|------------------------|--------------|------------------------|-------------|------------------|
|                              | $\chi^2$    | $p$ ( $\Phi$ )   | $\chi^2$     | $p$ ( $\Phi$ )         | $\chi^2$     | $p$ ( $\Phi$ )         | $\chi^2$    | $p$ ( $\Phi$ )   |
| Appearance: Scene            | .00         | .96              | .00          | .99                    | .10          | .75                    | .12         | .74              |
| Appearance: Gay Setting      | 2.74        | .10              | .55          | .46                    | 1.45         | .23                    | 1.08        | .29              |
| Interaction: Straight Others | .01         | .92              | .05          | .83                    | -.11         | .74                    | .00         | .97              |
| Interaction: Gay Others      | .13         | .72              | .22          | .64                    | .01          | .92                    | .55         | .46              |
| Talk: Sexual                 | <b>4.39</b> | <b>.04 (.09)</b> | <b>11.11</b> | <b>&lt; .001 (.15)</b> | <b>10.87</b> | <b>&lt; .001 (.15)</b> | <b>7.31</b> | <b>.01 (.12)</b> |
| Talk: LGBT Culture           | 1.55        | .34              | .30          | .58                    | 1.02         | .31                    | .64         | .42              |
| Talk: Humor                  | .04         | .84              | .07          | .79                    | .36          | .55                    | .61         | .43              |
| Behavior: Sexual             | <b>5.91</b> | <b>.02 (.11)</b> | <b>9.58</b>  | <b>.01 (.14)</b>       | <b>8.98</b>  | <b>.03 (.13)</b>       | <b>4.41</b> | <b>.04 (.09)</b> |
|                              | Ted         |                  | Lindsay      |                        | Melanie      |                        | Debbie      |                  |
|                              | $\chi^2$    | $p$ ( $\Phi$ )   | $\chi^2$     | $p$ ( $\Phi$ )         | $\chi^2$     | $p$ ( $\Phi$ )         | $\chi^2$    | $p$ ( $\Phi$ )   |
| Appearance: Scene            | .02         | .90              | .05          | .83                    | .00          | .97                    | .01         | .94              |
| Appearance: Gay Setting      | .46         | .50              | 1.37         | .24                    | .72          | .40                    | .00         | .96              |
| Interaction: Straight Others | .04         | .84              | .30          | .58                    | .00          | .97                    | .06         | .81              |
| Interaction: Gay Others      | .31         | .58              | .12          | .73                    | .01          | .94                    | .01         | .94              |
| Talk: Sexual                 | 2.98        | .08              | 1.97         | .16                    | 1.02         | .31                    | .13         | .72              |
| Talk: LGBT Culture           | .22         | .64              | .18          | .67                    | .00          | .98                    | .96         | .33              |
| Talk: Humor                  | .04         | .84              | .00          | .99                    | 1.05         | .31                    | .72         | .40              |
| Behavior: Sexual             | 1.95        | .16              | <b>6.60</b>  | <b>.01 (.11)</b>       | <b>7.43</b>  | <b>.01 (.12)</b>       | -----       | -----            |

*Note.* All Chi-Square analyses,  $N = 502$ ,  $df = 1$ . Significant  $X^2$  values are in bold and significant  $p$  values are accompanied by Phi statistics. All significant  $X^2$  values suggest greater frequency in the accentuated condition than in the sanitized condition. Fisher's exact tests are displayed for analyses with expected values  $< 5/\text{cell}$ . Debbie was not coded as engaging in sexual behavior in any scene from any episode in either condition.

# PREJUDICE REDUCTION THROUGH PARASOCIAL CONTACT

Table A2

## *Parasocial Relationship Growth Curve Models*

|                          | <u>Outgroup<br/>Character</u> |     | <u>Ingroup<br/>Character</u> |     |
|--------------------------|-------------------------------|-----|------------------------------|-----|
|                          | Estimate                      | SE  | Estimate                     | SE  |
| <i>Baseline Model</i>    |                               |     |                              |     |
| Intercept Mean           | 3.89***                       | .09 | 4.38***                      | .11 |
| Slope Mean               | .50***                        | .09 | .20*                         | .09 |
| Intercept Variance       | -.47***                       | .08 | .45***                       | .08 |
| Slope Variance           | -.42***                       | .13 | -.35*                        | .18 |
| Covariance               | -.38                          | .26 | .30                          | .29 |
| <i>Conditional Model</i> |                               |     |                              |     |
| Experimental Condition   |                               |     |                              |     |
| Intercept                | -.12                          | .14 | -.21                         | .17 |
| Slope                    | -.08                          | .15 | -.21                         | .14 |
| Sexual Prejudice         |                               |     |                              |     |
| Intercept                | -.13                          | .07 | -.13                         | .11 |
| Slope                    | .18*                          | .08 | -.04                         | .09 |
| Sex                      |                               |     |                              |     |
| Intercept                | -.19                          | .15 | -.02                         | .17 |
| Slope                    | .12                           | .16 | -.11                         | .14 |
| Race                     |                               |     |                              |     |
| Intercept                | .22                           | .15 | .22                          | .18 |
| Slope                    | -.47**                        | .16 | -.34*                        | .15 |

*Note.* Sex (1 = male, 2 = female), race (1 = white, 2 = racial minority), and condition (1 = accentuated, 2 = sanitized) were dichotomously coded ( $n = 72$ ). Outgroup character equates to the gay character that received the highest T4 PSR score for each participant. Ingroup character represents T4 PSR scores for Debbie, the only heterosexual protagonist in the experimental stimulus. \* $p < .05$ , \*\* $p < .01$ , \*\*\* $p < .001$ .

## PREJUDICE REDUCTION THROUGH PARASOCIAL CONTACT

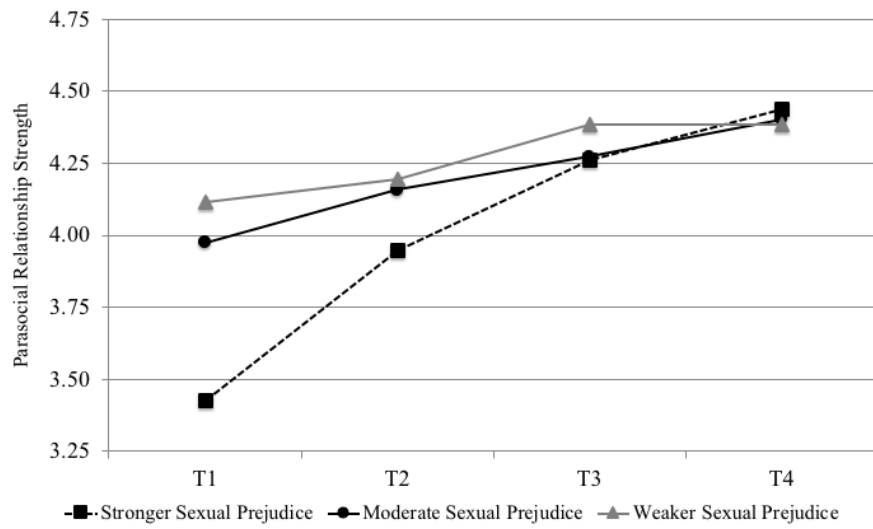

(a)

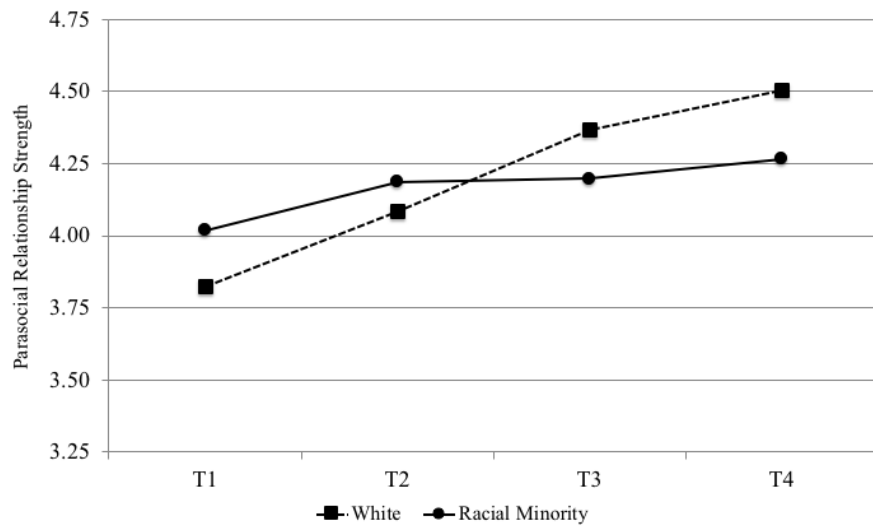

(b)

Figure A1. PSR growth with outgroup characters over time by significant moderators, (a) pretest prejudice and (b) race ( $n = 72$ ).

## PREJUDICE REDUCTION THROUGH PARASOCIAL CONTACT

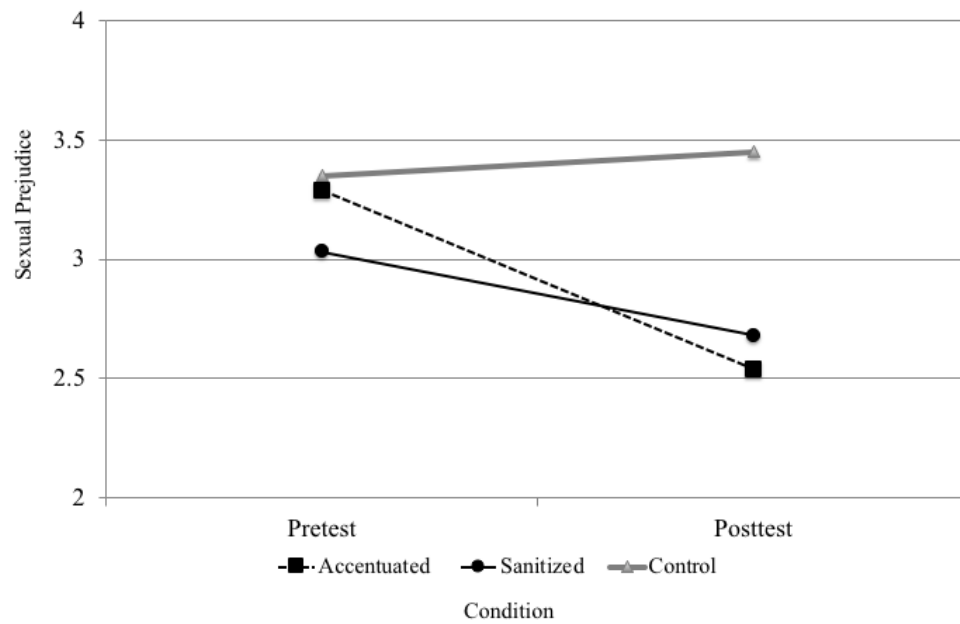

Figure A2. Pretest and posttest prejudice scores by condition ( $N = 112$ ).

## PREJUDICE REDUCTION THROUGH PARASOCIAL CONTACT

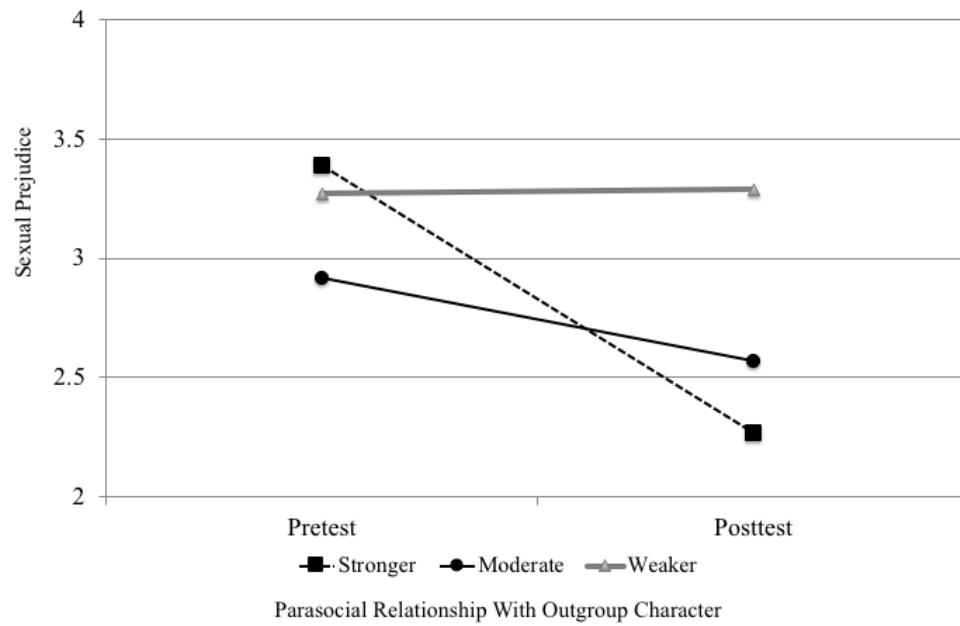

*Figure A3.* Pretest and posttest prejudice scores by PSR strength with outgroup character ( $n = 72$ ).
